# Supplementary material
Source: PubMed Central journal article supplement (PMC4087061)
Supplement: NIHMS595172-supplement-1.pdf [file NIHMS595172-supplement-1.pdf]

## **SUPPLEMENTARY INFORMATION**

### **Chronic variable stress activates hematopoietic stem cells**

Timo Heidt\*, Hendrik B. Sager\*, Gabriel Courties, Partha Dutta, Yoshiko Iwamoto, Alex Zaltsman, Constantin von zur Muhlen, Christoph Bode, Gregory L. Fricchione, John Denninger, Charles P. Lin, Claudio Vinegoni, Peter Libby, Filip K. Swirski, Ralph Weissleder, Matthias Nahrendorf

## SUPPLEMENTARY FIGURES

### Supplementary Figure 1

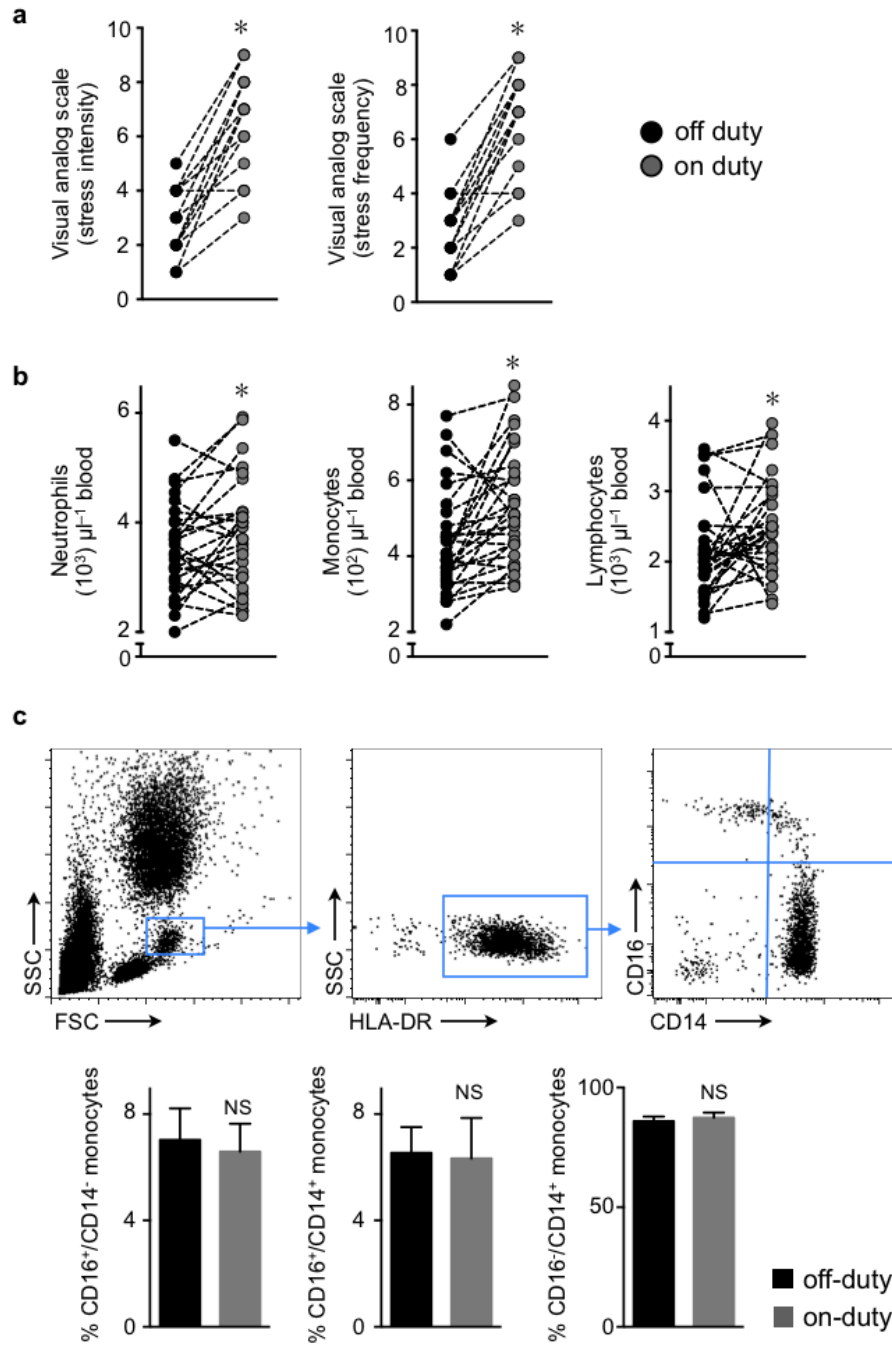

**Supplementary Figure 1: ICU residents.** **a**, Visual analog scales for stress intensity and frequency ( $n = 14$ , Wilcoxon test) and **b**, blood leukocyte subsets in medical residents ( $n = 29$ , Wilcoxon test). **c**, Gating strategy and analysis of monocyte subsets from medical residents ( $n = 14$ , Student's  $t$ -test, mean  $\pm$  s.e.m.). \*  $P < 0.05$ .

## Supplementary Figure 2

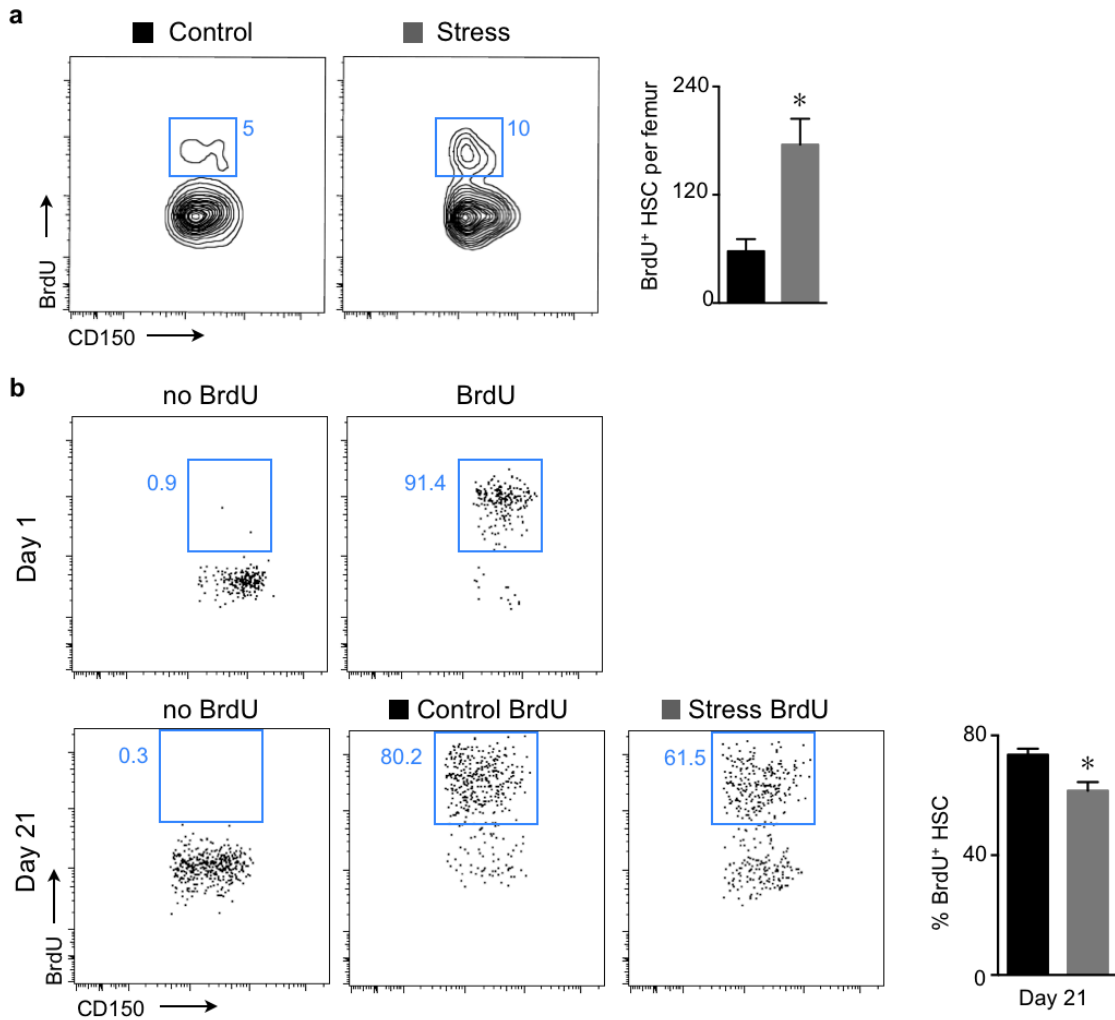

**Supplementary Figure 2: HSC proliferation, a**, Representative dot plots and analysis of HSC proliferation after 3 weeks of stress using an *in vivo* BrdU pulse 24 hours prior to the harvest ( $n = 4-5$  per group, Mann–Whitney test). **b**, BrdU pulse–chase experiment. Mice were exposed to BrdU in drinking water for 2 weeks, which led to >90% BrdU labeling of HSC (Day 1,  $n = 3$ ). Additional cohorts of mice were exposed to 3 weeks of stress or remained non–stressed after BrdU labeling. The lower panel shows representative dot plots and quantification of BrdU retention in HSC (Day 21,  $n = 10$  per group, Student's t–test). Mean  $\pm$  s.e.m., \*  $P < 0.05$ .

### Supplementary Figure 3

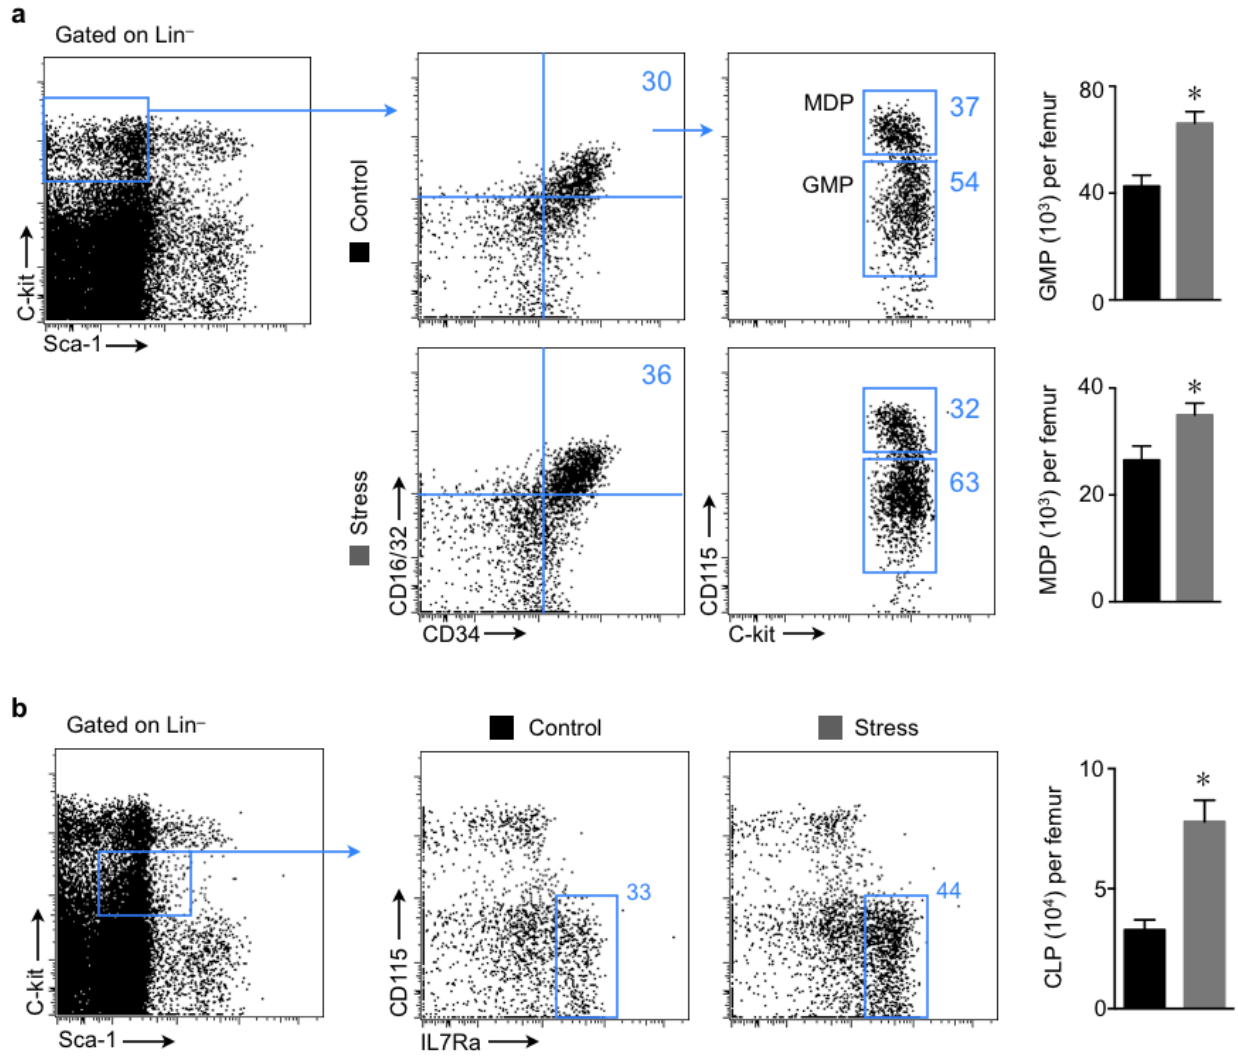

**Supplementary Figure 3: Hematopoietic progenitor numbers.** **a**, Gating strategy and quantification of GMP (Lin<sup>-</sup> c-kit<sup>+</sup> Sca-1<sup>-</sup> CD16/32<sup>+</sup> CD34<sup>+</sup> CD115<sup>-</sup>) and MDP (Lin<sup>-</sup> c-kit<sup>int/+</sup> Sca-1<sup>-</sup> CD16/32<sup>+</sup> CD34<sup>+</sup> CD115<sup>+</sup>) in the bone marrow of C57BL/6 mice after 3 weeks of stress ( $n = 5-7$  per group, Mann-Whitney test). **b**, Gating strategy and quantification of common lymphoid progenitors (CLP, Lin<sup>-</sup> c-kit<sup>int</sup> Sca-1<sup>int</sup> CD115<sup>-</sup> IL7R<sup>+</sup>) in the bone marrow of C57BL/6 mice after 3 weeks of stress compared to non-stressed controls ( $n = 5$  per group, Mann-Whitney test). Mean  $\pm$  s.e.m., \*  $P < 0.05$ .

## Supplementary Figure 4

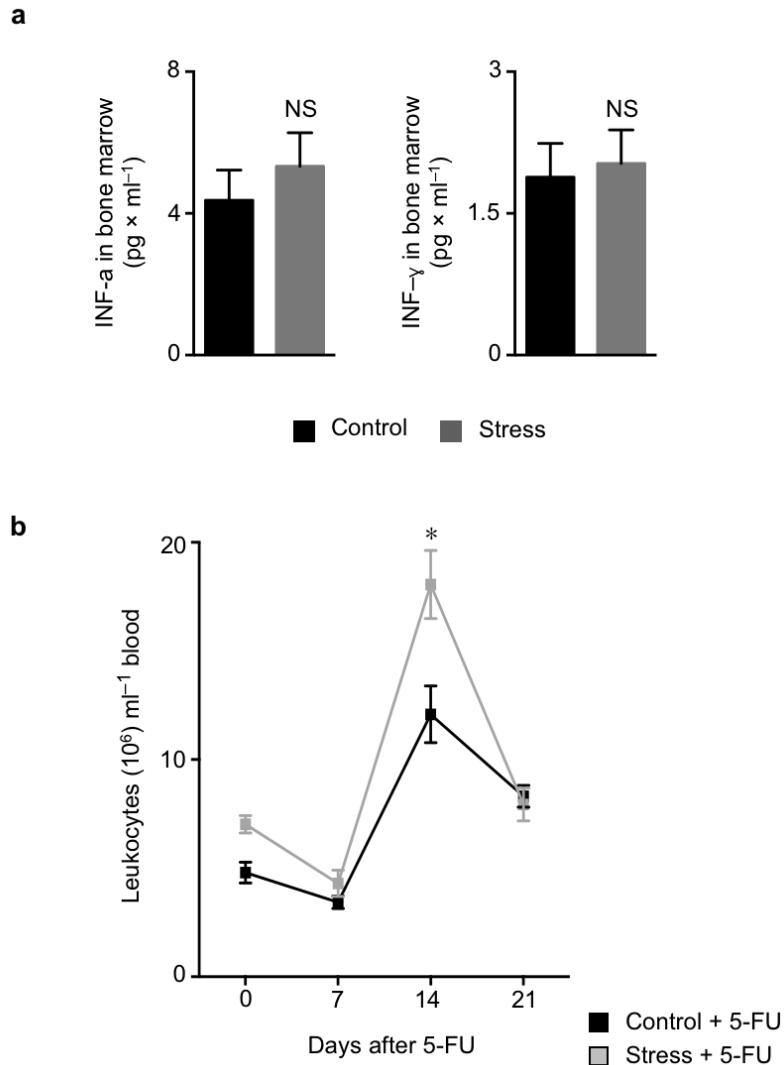

**Supplementary Figure 4: Interferons and 5-FU challenge.** **a**, ELISA for interferons  $\alpha$  and  $\gamma$  in the bone marrow of C57BL/6 mice exposed to 3 weeks of stress ( $n = 7-8$  per group, Student's  $t$ -test). **b**, 5-FU challenge in C57BL/6 mice. After 3 weeks of stress or in non-stressed controls, mice were injected with 5-FU (day 0, 150 mg/kg bodyweight). Blood leukocytes were analyzed on days 0, 7, 14 and 21 after injection ( $n = 5$  per group, multiple  $t$ -tests corrected with Holm-Sidak method). Mean  $\pm$  s.e.m., \*  $P < 0.05$ .

## Supplementary Figure 5

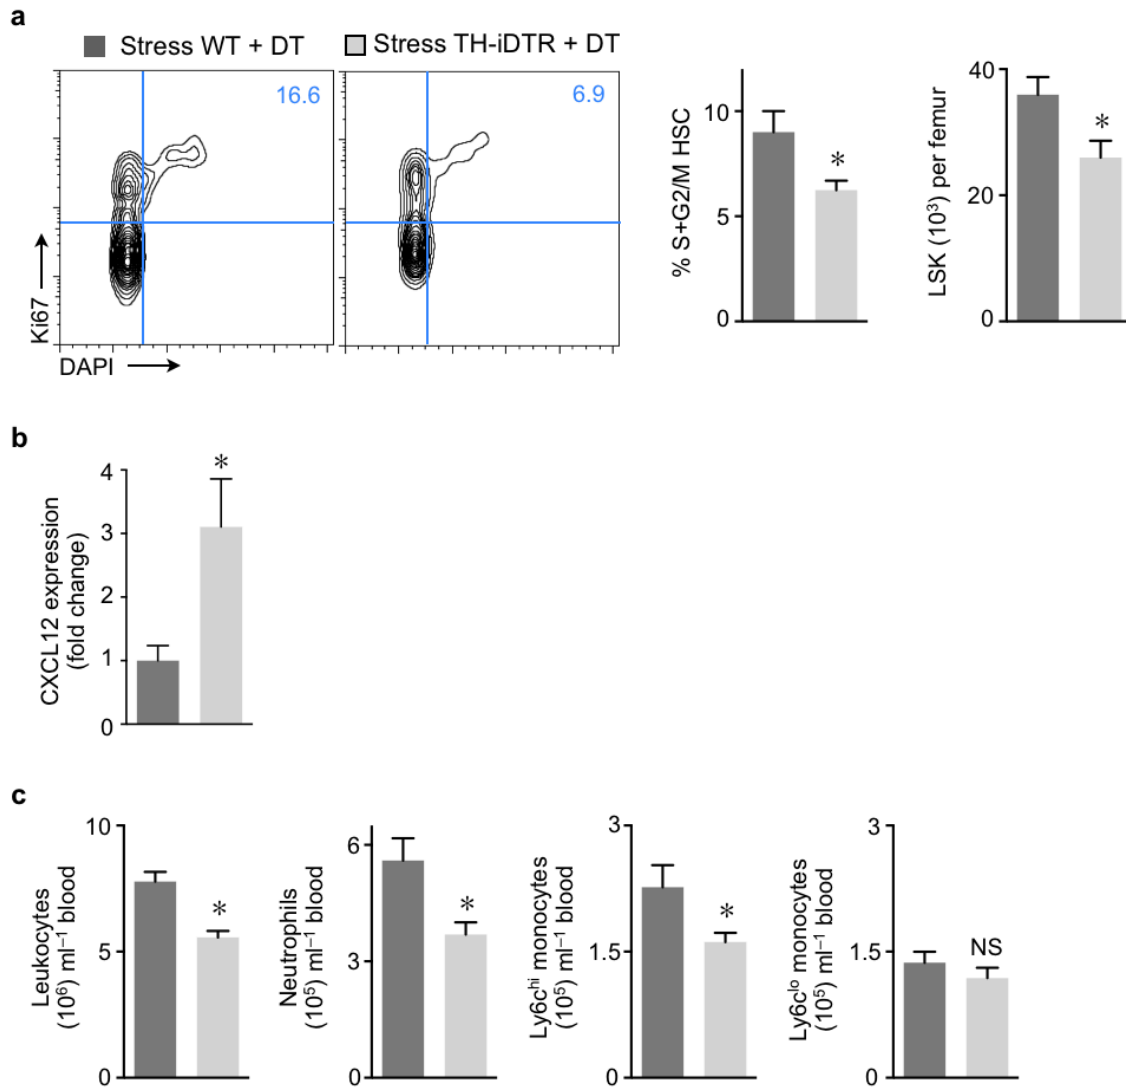

**Supplementary Figure 5: Depletion of sympathetic nervous signaling.** Tyrosine hydroxylase (TH) Cre-iDTR or controls were injected twice with diphtheria toxin (0.1  $\mu\text{g}/\text{kg}$  bodyweight on days 0 and 2, DT). Mice were then exposed to 3 weeks of stress. **a**, Cell cycle analysis of bone marrow HSC ( $n = 7-8$  per group, Mann-Whitney test). **b**, qPCR for relative expression of bone marrow CXCL12 ( $n = 7-8$  per group, Mann-Whitney test). **c**, Quantification of total leukocytes, neutrophils and monocyte subsets in the blood ( $n = 7-8$  per group, Student's t-test). Mean  $\pm$  s.e.m., \*  $P < 0.05$ .

## Supplementary Figure 6

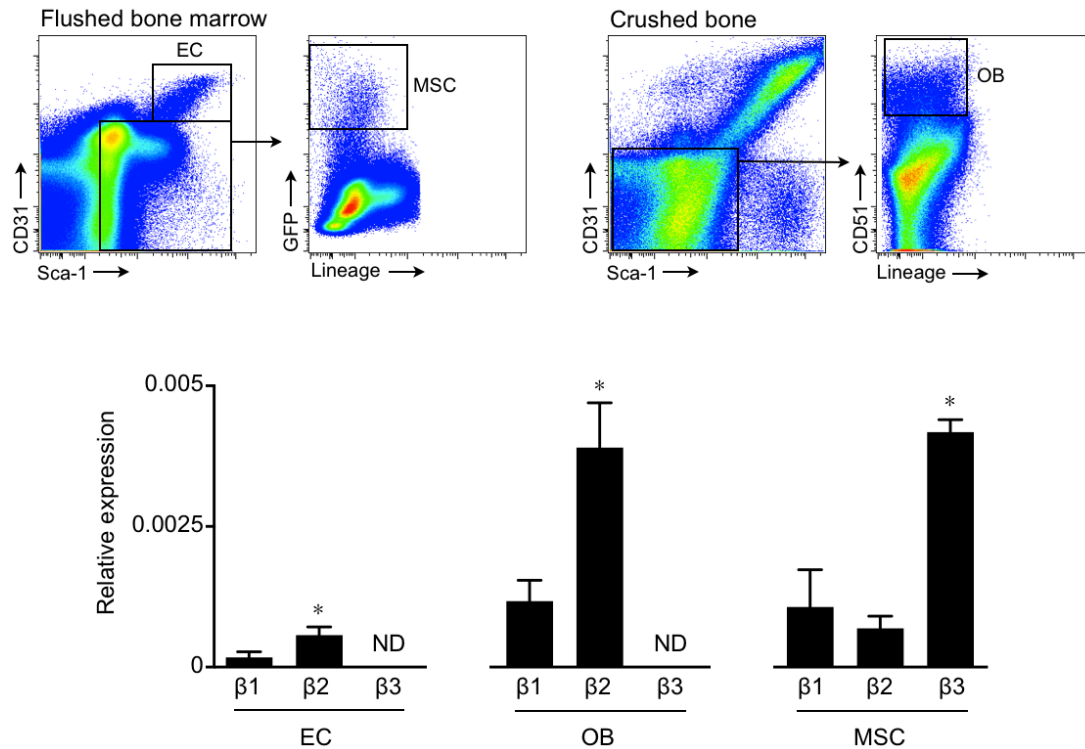

### Supplementary Figure 6: Expression of $\beta$ -adrenergic receptors in the bone marrow.

Endothelial cells (EC), osteoblastic lineage cells (OB) and mesenchymal stromal cells (MSC) were FACS-sorted from nestin-GFP mice ( $n = 3$ ). qPCR of sorted cells depicts the expression of  $\beta$ -adrenergic receptors ( $\beta_1$ ,  $\beta_2$ ,  $\beta_3$ ) relative to *Gapdh* for each cell type ( $n = 3$ , one-way ANOVA). ND: not detectable. Mean  $\pm$  s.e.m., \*  $P < 0.05$ .

## Supplementary Figure 7

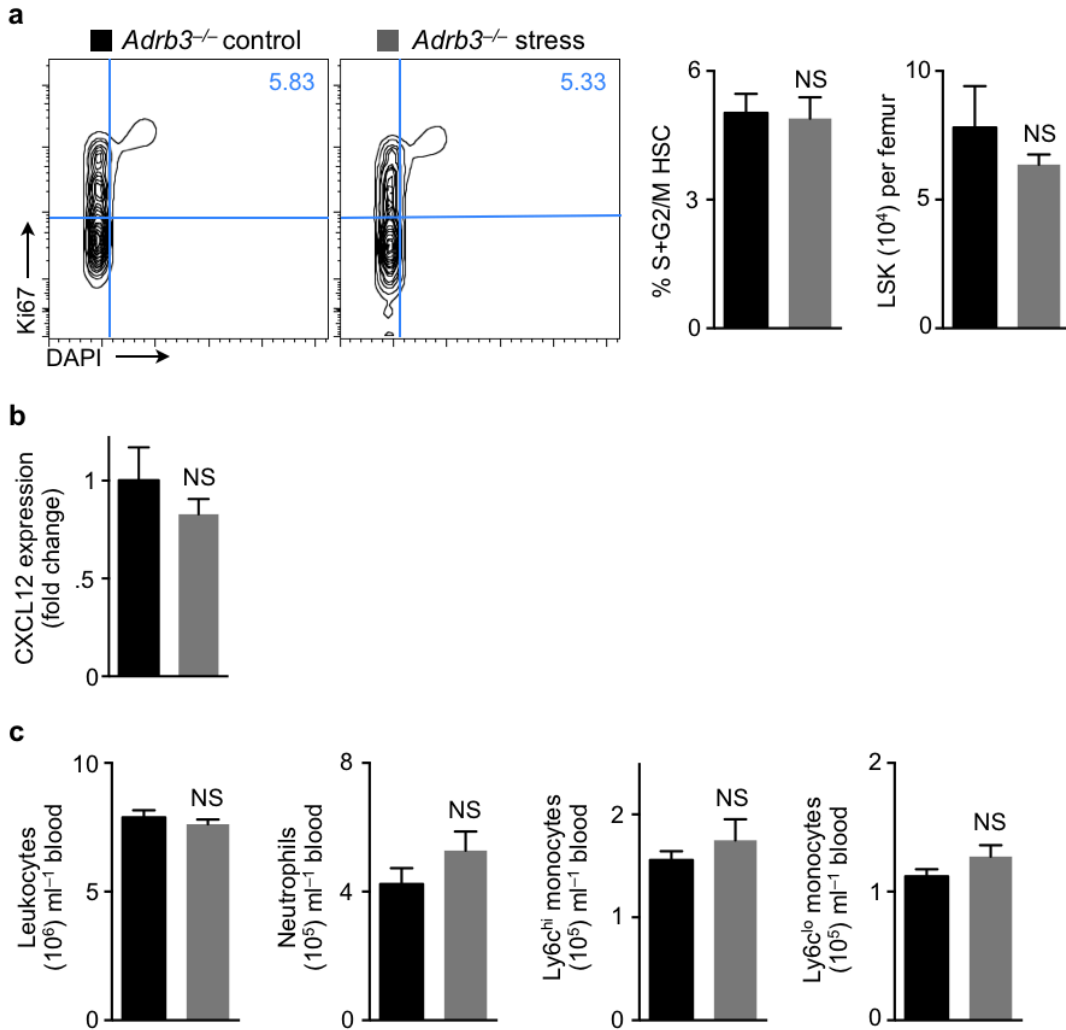

**Supplementary Figure 7:  $\beta_3$ -adrenoreceptor deficient mice (*Adrb3*<sup>-/-</sup>) were stressed for 3 weeks. **a**, Cell cycle analysis of bone marrow HSC and quantification of LSK ( $n = 7-9$  per group, Student's t-test). **b**, qPCR for relative expression of CXCL12 in the bone marrow ( $n = 7-9$  per group, Student's t-test). **c**, blood leukocyte numbers. Mean  $\pm$  s.e.m.**



## Supplementary Figure 8

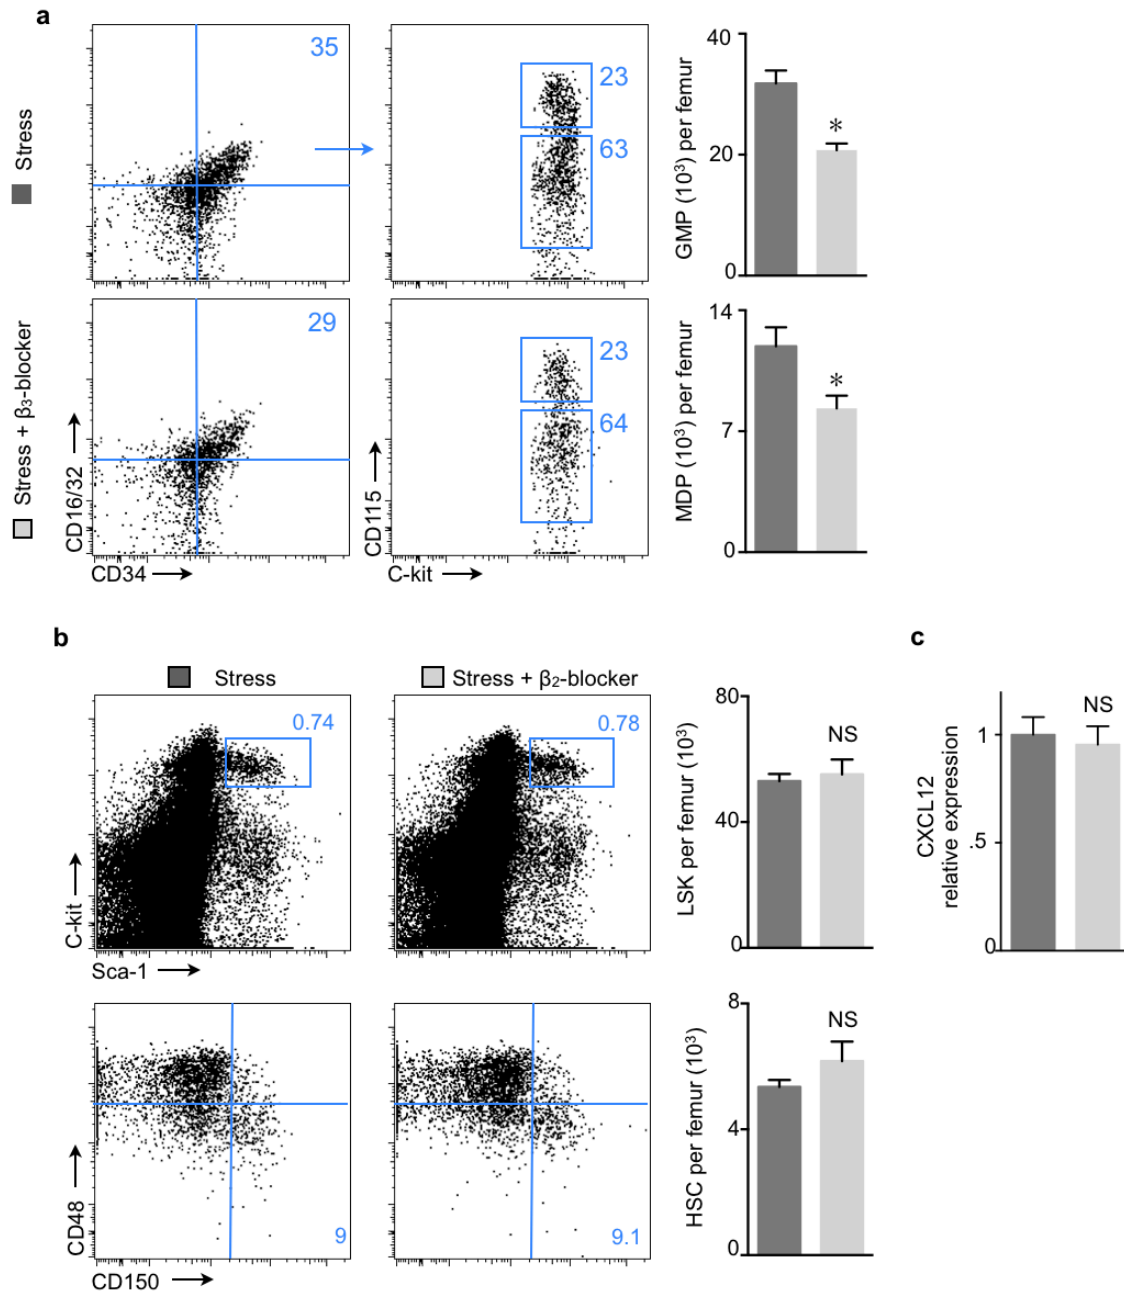

**Supplementary Figure 8:  $\beta_3$  adrenoreceptor blocker treatment.** **a**, Dot plots and quantification of GMP ( $\text{Lin}^- \text{c-kit}^+ \text{Sca-1}^- \text{CD16/32}^+ \text{CD34}^+ \text{CD115}^{\text{low}}$ ) and MDP ( $\text{Lin}^- \text{c-kit}^{\text{int/+}} \text{Sca-1}^- \text{CD16/32}^+ \text{CD34}^+ \text{CD115}^+$ ) in the bone marrow of stressed mice after treatment with a  $\beta_3$  adrenoreceptor blocker ( $n = 5$  per group, Mann–Whitney test). **b**, Representative dot plots and quantification of LSK and HSC from mice after 3 weeks of stress with and without  $\beta_2$  adrenoreceptor blocker treatment ( $n = 8$  per group, Mann–Whitney test). **c**, qPCR for relative expression of CXCL12 in the bone marrow of stressed mice with or without  $\beta_2$  adrenoreceptor blocker treatment ( $n = 8$  per group, Mann–Whitney test). Mean  $\pm$  s.e.m., \*  $P < 0.05$ .

## Supplementary Figure 9

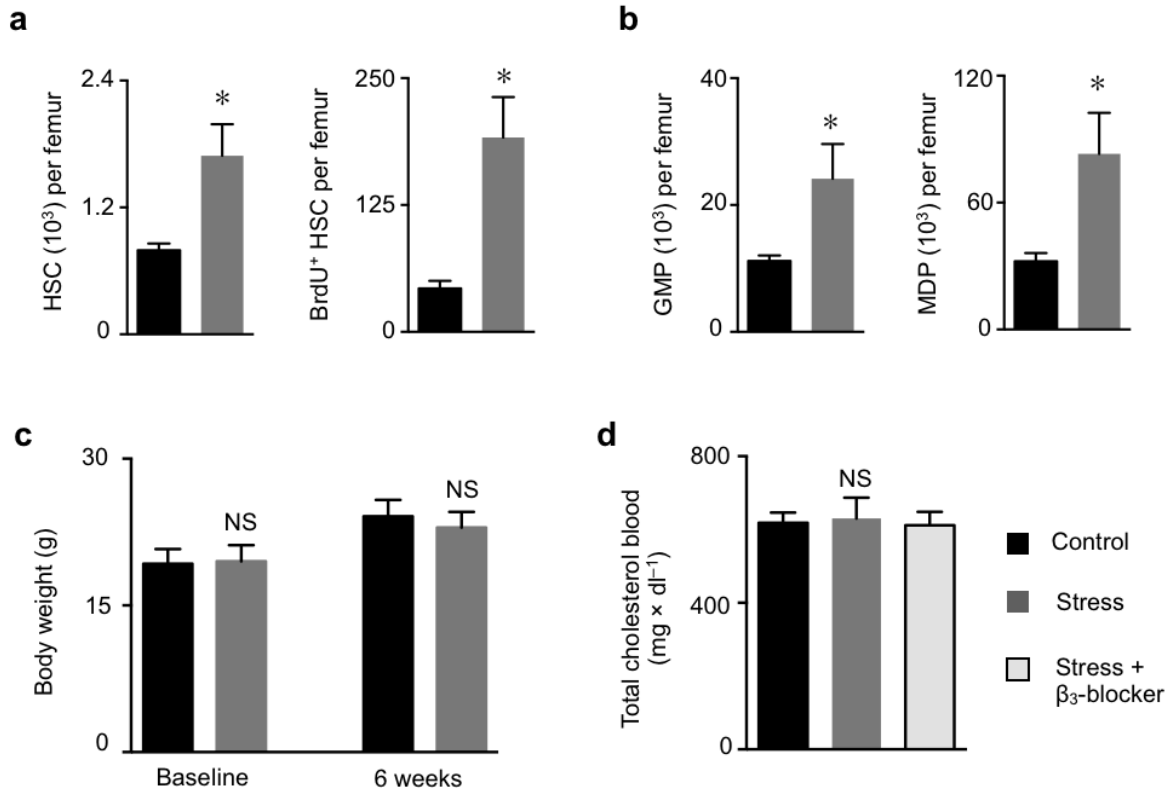

**Supplementary Figure 9: Stress in atherosclerotic mice.** **a**, Quantification of HSC numbers and BrdU incorporation 24 hours after BrdU pulse ( $n = 4\text{--}5$  per group, Mann–Whitney test) in *ApoE*<sup>-/-</sup> mice on a high cholesterol diet after 6 weeks. **b**, Quantification of GMP and MDP numbers. **c**, Body weight in *ApoE*<sup>-/-</sup> mice was measured before and after 6 weeks of stress and high cholesterol diet ( $n = 15$  per group, one–way ANOVA). **d**, Total cholesterol was measured in the blood of *ApoE*<sup>-/-</sup> mice with or without  $\beta_3$  adrenoreceptor blocker treatment ( $n = 5$  per group, one–way ANOVA). Mean  $\pm$  s.e.m. \*  $P < 0.05$ .

## Supplementary Figure 10

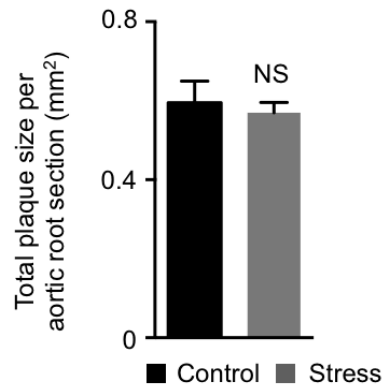

**Supplementary Figure 10: Plaque size** in aortic root sections of *ApoE*<sup>-/-</sup> mice after 6 weeks of stress ( $n = 10$  per group, Student's t-test). Mean  $\pm$  s.e.m.

## Supplementary Figure 11

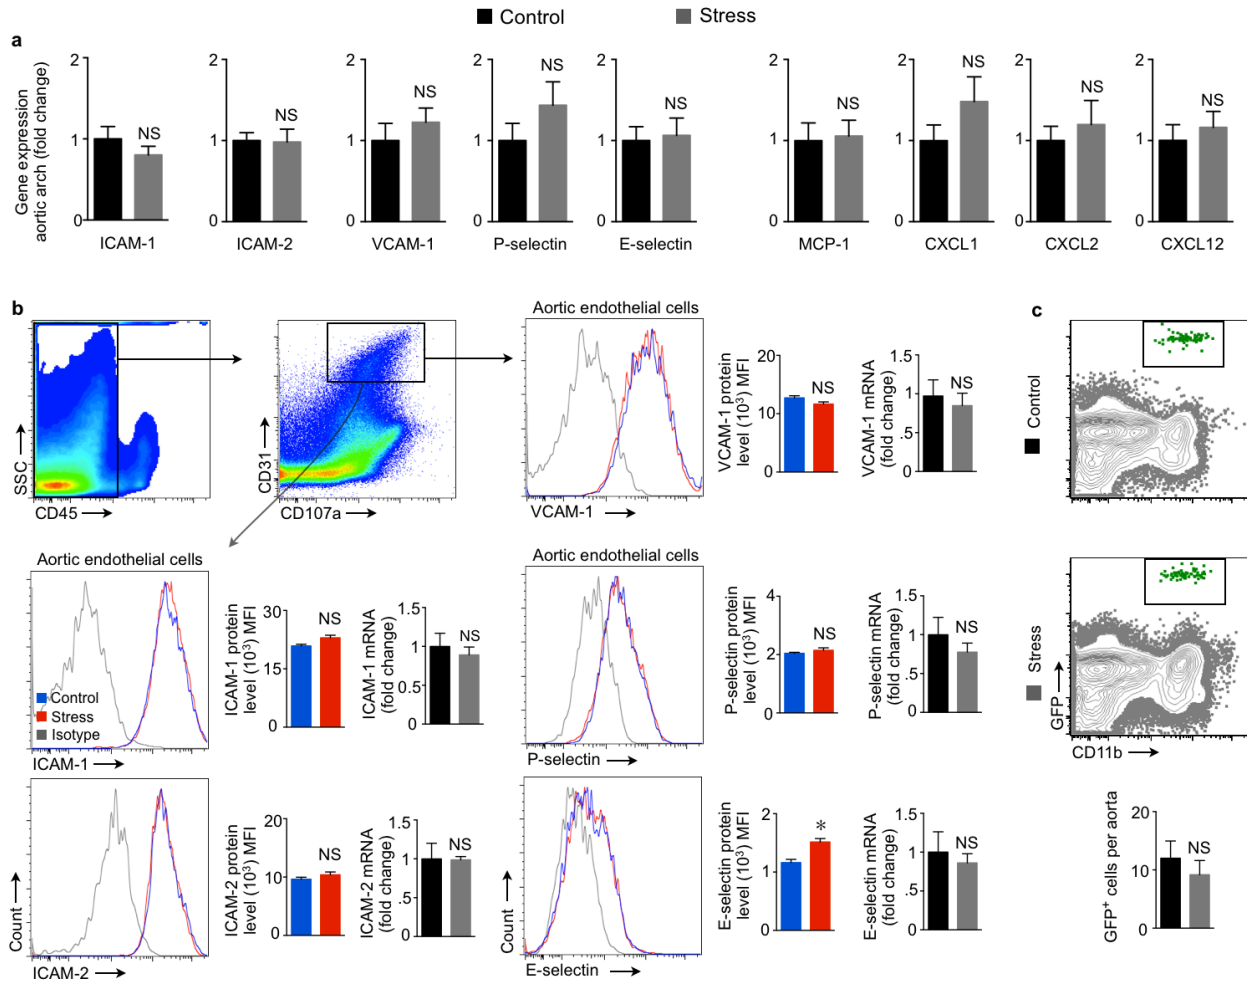

**Supplementary Figure 11: Adhesion molecules.** **a**, qPCR for expression of leukocyte adhesion molecules and chemokines in aortae of *ApoE*<sup>-/-</sup> mice after 6 weeks of stress ( $n = 9-10$  per group, Student's *t*-test). **b**, Gating endothelial cells and quantification of mean fluorescence intensity (MFI) for leukocyte adhesion molecules in *ApoE*<sup>-/-</sup> mice after 6 weeks of stress (left bar graphs,  $n = 8$  per group, Mann-Whitney test). Additionally, endothelial cells FACS-sorted from aortae were assessed with qPCR for leukocyte adhesion molecule mRNA (right bar graphs,  $n = 7$  per group, Student's *t*-test). **c**, Quantification of GFP<sup>+</sup> myeloid cells in the aorta after adoptive transfer of GFP<sup>+</sup> Ly6C<sup>high</sup> monocytes and neutrophils in *ApoE*<sup>-/-</sup> mice after 6 weeks of stress compared to non-stressed *ApoE*<sup>-/-</sup> ( $n = 6$  per group, Mann-Whitney test). Mean  $\pm$  s.e.m., \*  $P < 0.05$ .

## Supplementary Figure 12

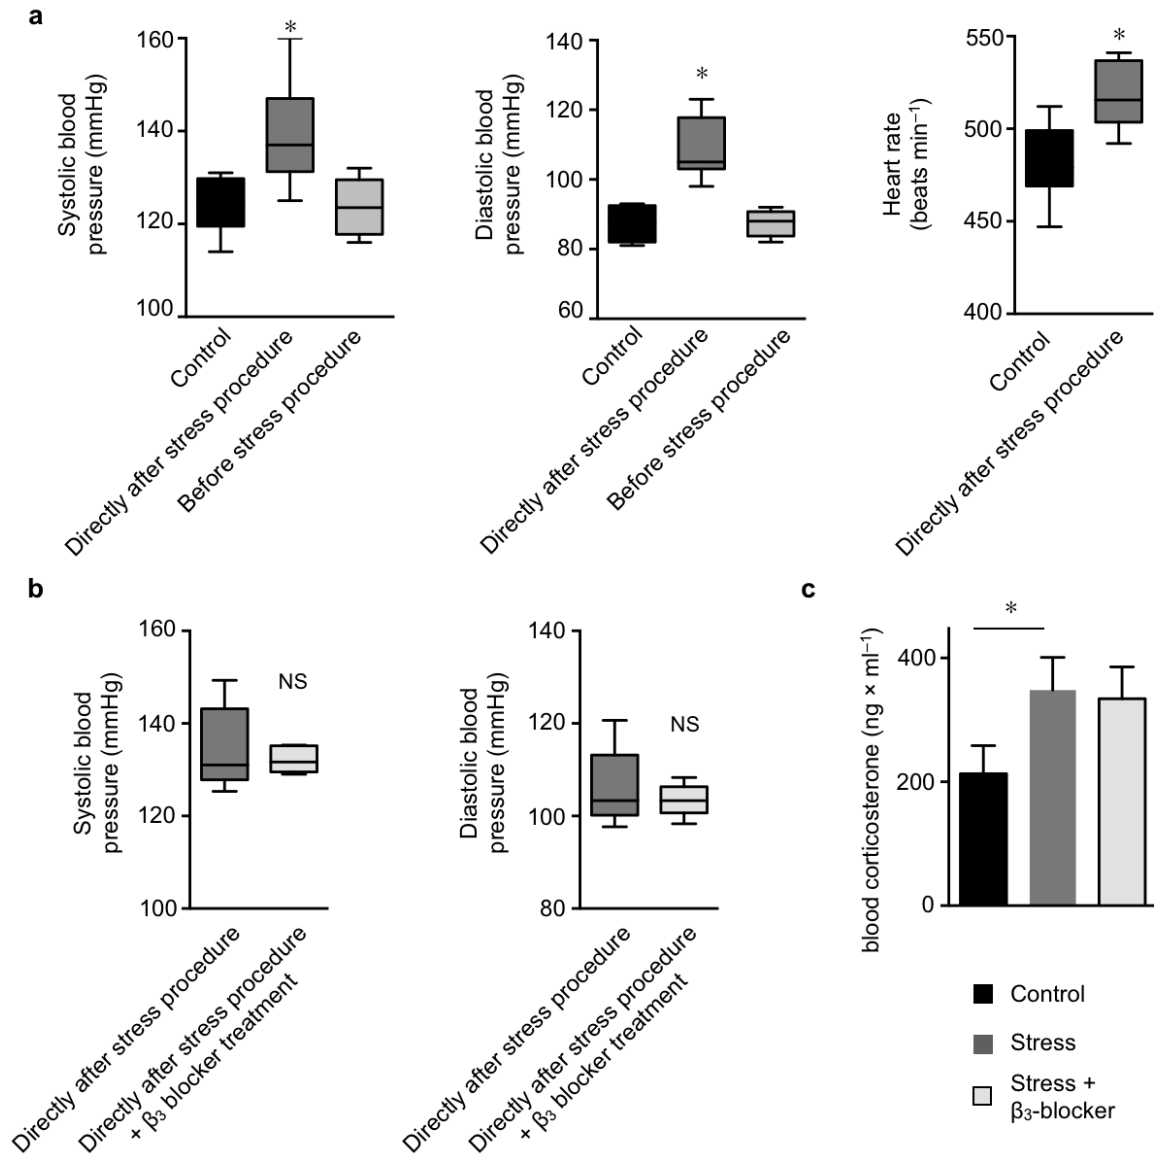

**Supplementary Figure 12: Stress physiology.** **a**, Blood pressure was measured in non-stressed control mice and in mice after exposure to stress for 6 weeks. In stressed mice, blood pressure was measured before the stress procedure and directly thereafter ( $n = 8$  per group, one-way ANOVA). Heart rate was measured directly after stress ( $n = 7-8$  per group, Mann-Whitney test). Mean  $\pm$  95% confidence interval. **b**, Systolic and diastolic blood pressure in *ApoE*<sup>-/-</sup> mice on a high cholesterol diet after 6 weeks of stress with and without  $\beta_3$  adrenoreceptor blocker treatment ( $n = 5$  per group, Mann-Whitney test). **c**, ELISA for blood corticosterone in mice after one week of stress with and without  $\beta_3$  adrenoreceptor blocker treatment ( $n = 10$  per group, one-way ANOVA). Mean  $\pm$  95% confidence interval or  $\pm$  s.e.m. \*  $P < 0.05$ .

## Supplementary Figure 13

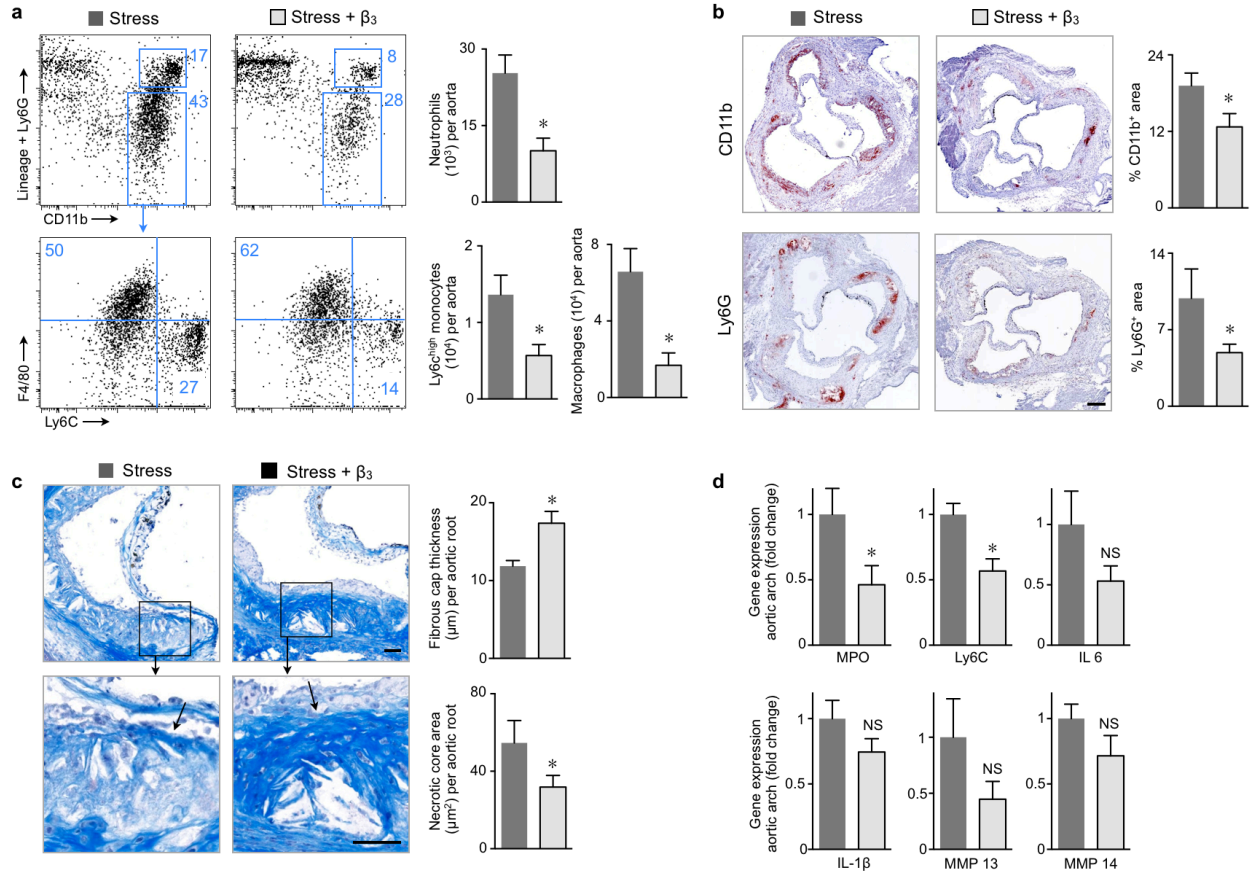

**Supplementary Figure 13:  $\beta_3$  adrenoreceptor blocker treatment dampens stress impact.** **a**, Dot plots and quantification of myeloid cells in aortae of *ApoE*<sup>-/-</sup> mice after 6 weeks of stress with or without  $\beta_3$  adrenoreceptor blocker treatment ( $n = 5$  per group, Mann–Whitney test). **b**, Histology for CD11b and Ly6G, scale bar indicates 200 $\mu\text{m}$  ( $n = 5$  per group, Mann–Whitney test). **c**, Masson Trichrome staining (arrows point at fibrous cap covering a necrotic core). Scale bars depict 50  $\mu\text{m}$  ( $n = 5$  per group, Mann–Whitney). **d**, qPCR for aortic expression of inflammatory genes in *ApoE*<sup>-/-</sup> mice after 6 weeks of stress with and without  $\beta_3$  adrenoreceptor blocker treatment ( $n = 5$  per group, Mann–Whitney test). Mean  $\pm$  s.e.m., \*  $P < 0.05$ .

### Supplementary Table 1

| Day     | Procedure                | Duration          |
|---------|--------------------------|-------------------|
| Day 1   | cage tilt                | 6 hours           |
| Day 2   | isolation/ crowding      | 4 hours / 2 hours |
| Day 3   | damp bedding             | 6 hours           |
| Day 4   | removal of bedding       | 6 hours           |
| Day 4/5 | overnight illumination   | 12 hours          |
| Day 5   | cage tilt                | 6 hours           |
| Day 6   | rapid light-dark changes | 2 hours           |
| Day 7   | rapid light-dark changes | 2 hours           |

**Supplementary Table 1: Mouse stress protocol.** Different stressors were used to avoid habituation. The order of stressors changed randomly in consecutive weeks.

## Supplementary Table 2

| Group   | Dose    | Response | Tested |
|---------|---------|----------|--------|
| Control | 15,000  | 1        | 7      |
| Control | 62,000  | 7        | 10     |
| Control | 125,000 | 6        | 7      |
| Control | 500,000 | 10       | 10     |
| Stress  | 15,000  | 1        | 10     |
| Stress  | 62,000  | 4        | 8      |
| Stress  | 125,000 | 3        | 5      |
| Stress  | 500,000 | 10       | 10     |

**Supplementary Table 2: Long-term competitive repopulation assay** using limiting dilutions of whole bone marrow from stressed or non-stressed CD45.1 donor mice, co-transferred with  $5 \times 10^5$  CD45.2 competitor cells into lethally irradiated CD45.2 recipients. Table lists mice per dilution step and response (> 0.1% multi-lineage blood chimerism).
